# Supplementary material for: Development and validation of real-time PCR screening methods for detection of cry1A.105 and cry2Ab2 genes in genetically modified organisms
Source: PubMed Central journal article supplement — Anal Bioanal Chem. 2011 Mar 29;400(5):1433–42. doi: 10.1007/s00216-011-4875-9 (PMC3081059; doi:10.1007/s00216-011-4875-9), 2011-03-29
Supplement: 216_2011_4875_MOESM1_ESM.pdf [file 216_2011_4875_MOESM1_ESM.pdf]

**Analytical and Bioanalytical Chemistry**

**Electronic Supplementary Material**

**Development and validation of real-time PCR screening methods for detection of *cry1A.105* and *cry2Ab2* genes in (un)authorized genetically modified organisms.**

Andréia Z. Dinon, Theo W. Prins, Jeroen P. van Dijk, Ana Carolina M. Arisi, Ingrid M. J. Scholtens, Esther J. Kok

**Table S1** Ct-value for *cryIA.105* and *cry2Ab2* detection by real time PCR with reference material GM maize MON89034 tested with 8 DNA concentrations in 9 PCR runs.

**A** *cryIA.105* detection in 9 PCR runs

| ng/PCR | Copies/PCR | 1     | 2     | 3            | 4     | 5     | 6     | 7            | 8            | 9            | Ct Mean | SD   |       |
|--------|------------|-------|-------|--------------|-------|-------|-------|--------------|--------------|--------------|---------|------|-------|
| 150    | 55046      | 23.77 | 25.08 | 25.58        | 25.66 | 25.80 | 26.81 | 27.03        | 26.23        | 25.21        | 25.72   | 0.73 |       |
|        |            | 23.87 | 24.91 | 25.43        | 25.25 | 25.66 | 25.81 | 24.85        | 25.78        | 24.54        |         |      |       |
| 30     | 11009      | 25.66 | 26.03 | 26.28        | 25.94 | 26.07 | 25.98 | 25.70        | 26.24        | 25.67        | 25.96   | 0.29 |       |
|        |            | 25.59 | 25.99 | 26.24        | 25.93 | 26.15 | 26.18 | 25.57        | 26.51        | 25.58        |         |      |       |
| 6      | 2202       | 28.38 | 28.45 | 28.45        | 28.26 | 28.34 | 28.45 | 28.09        | 28.68        | 28.21        | 28.34   | 0.24 |       |
|        |            | 28.06 | 28.33 | 28.58        | 28.31 | 28.65 | 28.48 | 27.91        | 28.60        | 28.10        |         |      |       |
| 1.2    | 440        | 30.29 | 30.51 | 30.79        | 30.56 | 30.63 | 30.98 | 30.40        | 30.72        | 30.45        | 30.62   | 0.15 |       |
|        |            | 30.16 | 30.55 | 30.72        | 30.68 | 30.53 | 30.71 | 30.58        | 30.68        | 30.54        |         |      |       |
| 0.6    | 220        | 31.12 | 31.74 | 31.66        | 31.19 | 31.29 | 31.39 | 31.05        | 31.52        | 31.23        | 31.42   | 0.25 |       |
|        |            | 31.07 | 31.51 | 32.08        | 31.27 | 31.79 | 31.68 | 31.31        | 31.88        | 31.44        |         |      |       |
| 0.25   | 88         | 32.53 | 32.78 | 32.75        | 32.16 | 32.21 | 32.91 | 32.41        | 32.57        | 32.19        | 32.58   | 0.36 |       |
|        |            | 32.51 | 32.74 | 32.84        | 32.55 | 32.66 | 32.88 | 32.43        | 33.43        | 32.52        |         |      |       |
| 0.05   | 18         | 35.59 | 35.52 | 35.10        | 34.87 | 34.71 | 35.23 | 34.58        | 35.31        | 35.16        | 35.40   | 0.58 |       |
|        |            | 35.38 | 34.90 | 36.82        | 35.35 | 35.51 | 36.15 | 35.64        | 35.99        | 34.76        |         |      |       |
|        |            |       | 35.36 | 36.19        | 36.07 | 35.52 | 35.19 | 35.15        | 35.84        | <b>35.90</b> |         |      |       |
|        |            |       | 35.20 | 36.42        | 35.24 | 35.33 | 34.67 | 35.95        | 34.79        | 35.03        |         |      |       |
|        |            |       | 35.79 | 34.99        | 36.03 | 35.77 | 35.70 | 35.57        | 35.61        | 35.11        |         |      |       |
|        |            |       | 35.21 | 35.63        | 34.58 | 35.25 | 35.91 | 34.48        | <b>37.24</b> | 35.32        |         |      |       |
|        |            |       | 35.26 | 35.38        | 34.93 | 35.57 | 34.25 | 35.67        | 35.40        | 34.99        |         |      |       |
|        |            |       | 36.25 | 35.81        | 34.69 | 34.87 | 37.44 | 34.90        | 35.87        | 34.54        |         |      |       |
|        |            |       | 37.04 | 39.17        | 37.24 | 36.22 | 38.71 | 37.33        | 36.84        | <b>39.65</b> |         |      | 36.98 |
|        |            |       | ND    | ND           | 38.63 | 39.45 | ND    | ND           | 36.40        | 37.99        |         |      | 38.14 |
| 0.01   | 4          |       | 38.29 | ND           | 38.10 | 38.78 | 36.68 | 36.90        | 38.11        | 36.69        | 37.69   | 1.00 |       |
|        |            |       | 37.42 | <b>42.25</b> | 36.80 | 37.66 | ND    | 37.25        | 37.62        | ND           |         |      |       |
|        |            |       | 39.21 | 37.91        | 37.23 | 38.36 | 37.91 | 36.79        | 38.21        | 37.73        |         |      |       |
|        |            |       | ND    | ND           | 36.47 | 37.94 | 37.22 | 35.55        | 37.26        | ND           |         |      |       |
|        |            |       | 37.73 | ND           | 37.06 | 38.18 | 40.01 | <b>38.47</b> | ND           | 37.88        |         |      |       |
|        |            |       | ND    | ND           | 38.38 | 38.89 | 39.58 | 35.56        | ND           | ND           |         |      |       |

**B** *cry2Ab2* detection in 9 PCR runs

| ng/PCR | Copies/PCR | 1     | 2            | 3            | 4            | 5     | 6            | 7            | 8     | 9            | Ct Mean | SD   |       |
|--------|------------|-------|--------------|--------------|--------------|-------|--------------|--------------|-------|--------------|---------|------|-------|
| 150    | 55046      | 24.70 | 23.54        | 24.55        | 24.02        | 23.80 | 24.07        | 23.89        | 23.68 | 23.54        | 23.75   | 0.65 |       |
|        |            | 25.08 | 23.27        | 24.27        | 23.58        | 23.67 | 22.55        | 23.11        | 23.44 | 22.71        |         |      |       |
| 30     | 11009      | 26.82 | 25.61        | 25.83        | 25.69        | 25.74 | 25.56        | 25.82        | 25.81 | 25.36        | 25.74   | 0.40 |       |
|        |            | 26.68 | 25.65        | 25.75        | 25.44        | 25.34 | 25.50        | 25.66        | 25.50 | 25.54        |         |      |       |
| 6      | 2202       | 29.03 | 28.12        | 28.21        | 27.98        | 27.87 | 27.64        | 27.94        | 27.99 | 27.80        | 28.13   | 0.35 |       |
|        |            | 28.96 | 27.87        | 28.15        | 28.10        | 28.10 | 28.26        | 28.21        | 27.92 | 28.18        |         |      |       |
| 1.2    | 440        | 31.76 | 30.72        | 30.78        | 30.57        | 30.60 | 30.52        | 30.74        | 30.38 | 30.72        | 30.68   | 0.43 |       |
|        |            | 31.78 | 30.62        | 30.48        | 30.67        | 30.18 | 30.40        | 30.50        | 30.38 | 30.44        |         |      |       |
| 0.6    | 220        | 32.28 | 31.57        | 31.57        | 31.53        | 31.37 | 31.47        | 31.08        | 30.93 | 31.40        | 31.50   | 0.39 |       |
|        |            | 32.56 | 31.49        | 31.39        | 31.53        | 31.15 | 31.71        | 31.47        | 31.37 | 31.20        |         |      |       |
| 0.25   | 88         | 33.58 | 32.24        | 32.84        | 32.57        | 33.03 | 32.69        | 32.68        | 32.60 | 32.54        | 32.76   | 0.42 |       |
|        |            | 34.02 | 32.67        | 32.57        | 32.72        | 32.59 | 32.70        | 32.46        | 32.60 | 32.58        |         |      |       |
| 0.05   | 18         | 35.95 | 34.60        | <b>34.67</b> | 33.70        | 35.17 | 34.37        | 34.90        | 35.85 | 34.53        | 35.35   | 0.76 |       |
|        |            | 36.60 | 34.94        | 35.70        | 35.35        | 37.23 | 34.81        | 35.21        | 34.47 | 34.23        |         |      |       |
|        |            |       | 34.59        | 35.78        | 34.59        | 35.99 | 35.37        | ND           | 34.65 | 35.30        |         |      |       |
|        |            |       | 35.75        | 35.91        | 35.46        | 35.66 | 35.52        | ND           | 35.57 | 34.90        |         |      |       |
|        |            |       | 34.35        | <b>36.97</b> | 34.64        | 34.21 | 35.27        | ND           | 35.50 | 34.85        |         |      |       |
|        |            |       | 36.19        | 35.39        | 36.19        | 36.12 | 36.43        | ND           | 34.98 | 35.23        |         |      |       |
|        |            |       | 35.01        | 35.77        | 34.86        | 37.79 | 35.88        | 34.69        | 36.41 | <b>36.66</b> |         |      |       |
|        |            |       | 35.13        | 35.33        | 35.67        | 35.16 | 34.86        | 35.13        | 35.31 | 36.55        |         |      |       |
|        |            |       | 39.06        | ND           | ND           | 36.45 | 36.34        | ND           | ND    | 36.56        |         |      | 37.75 |
|        |            |       | 38.94        | 37.97        | ND           | 36.43 | 37.65        | 36.55        | 36.85 | 36.10        |         |      | 38.28 |
| 0.01   | 4          |       | <b>36.11</b> | 39.13        | <b>35.87</b> | 37.29 | 36.97        | 36.17        | 37.77 | 37.80        | 37.16   | 0.88 |       |
|        |            |       | 37.61        | 36.44        | ND           | ND    | ND           | 37.24        | 36.36 | ND           |         |      |       |
|        |            |       | ND           | ND           | ND           | 37.67 | <b>38.84</b> | ND           | 37.14 | 36.84        |         |      |       |
|        |            |       | ND           | 36.39        | <b>37.75</b> | 36.94 | <b>35.78</b> | 37.72        | 38.59 | 36.95        |         |      |       |
|        |            |       | 37.76        | ND           | ND           | ND    | 36.70        | 35.87        | ND    | 35.61        |         |      |       |
|        |            |       | ND           | ND           | 36.48        | 36.74 | ND           | <b>33.92</b> | 36.33 | 37.78        |         |      |       |

\*ND = not detected

\*\*Outliers are in bold and they were not included in the analysis
